# Supplementary material for: A novel monoclonal antibody targeting coxsackie virus and adenovirus receptor inhibits tumor growth in vivo
Source: PubMed Central journal article supplement (PMC5225458; doi:10.1038/srep40400), 2017-01-11
Supplement: srep40400-s1.pdf [file srep40400-s1.pdf]

## Supplementary Information

### **A novel monoclonal antibody targeting coxsackie virus and adenovirus receptor inhibits tumor growth *in vivo***

Manabu Kawada<sup>1,2</sup>, Hiroyuki Inoue<sup>1</sup>, Masunori Kajikawa<sup>3</sup>, Masahito Sugiura<sup>3</sup>, Shuichi Sakamoto<sup>1</sup>, Sakiko Urano<sup>3</sup>, Chigusa Karasawa<sup>3</sup>, Ihomi Usami<sup>1</sup>, Mitsuru Futakuchi<sup>4</sup> & Tohru Masuda<sup>1</sup>

<sup>1</sup>Institute of Microbial Chemistry (BIKAKEN), Numazu, Microbial Chemistry Research Foundation, 18-24 Miyamoto, Numazu-shi, Shizuoka 410-0301, Japan

<sup>2</sup>Institute of Microbial Chemistry (BIKAKEN), Laboratory of Oncology, Microbial Chemistry Research Foundation, 3-14-23 Kamiosaki, Shinagawa-ku, Tokyo 141-0021, Japan

<sup>3</sup>Medical & Biological Laboratories Co., Ltd., 4-5-3 Sakae, Naka-ku, Nagoya, Aichi 460-0008, Japan

<sup>4</sup>Department of Molecular Toxicology, Nagoya City University Graduate School of Medical Sciences, 1 Kawasumi, Mizuho-cho, Mizuho-ku, Nagoya 467-8601, Japan

Correspondence and requests for materials should be addressed to M.Kaw. (email: kawadam@bikaken.or.jp)

# Supplementary Figure 1

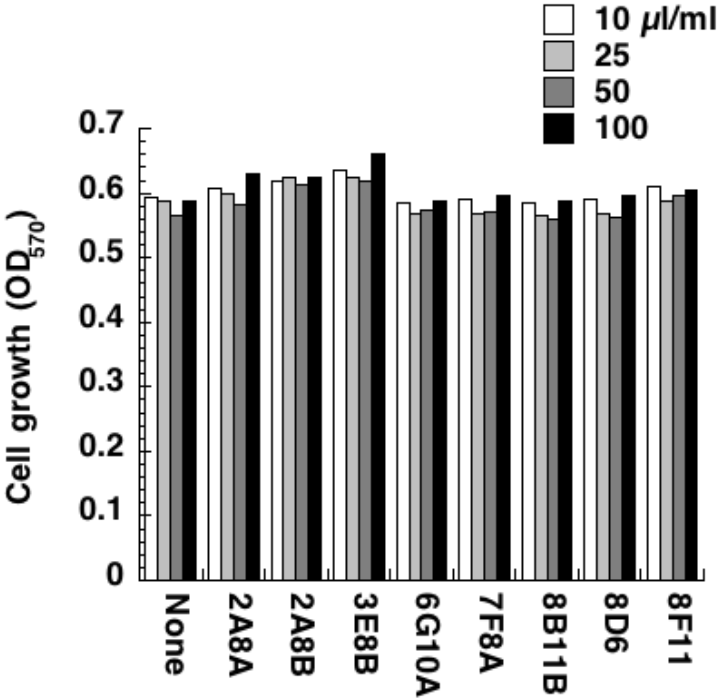

Supplementary Figure 1. Effect of anti-CXADR antibodies on the growth of LNCaP-CR cells *in vitro*. LNCaP-CR cells were cultured with the indicated concentrations of antibodies for 3 days. Cell growth was determined using MTT. The values are means of duplicate experiments. Each SE is less than 10%.

# Supplementary Figure 2

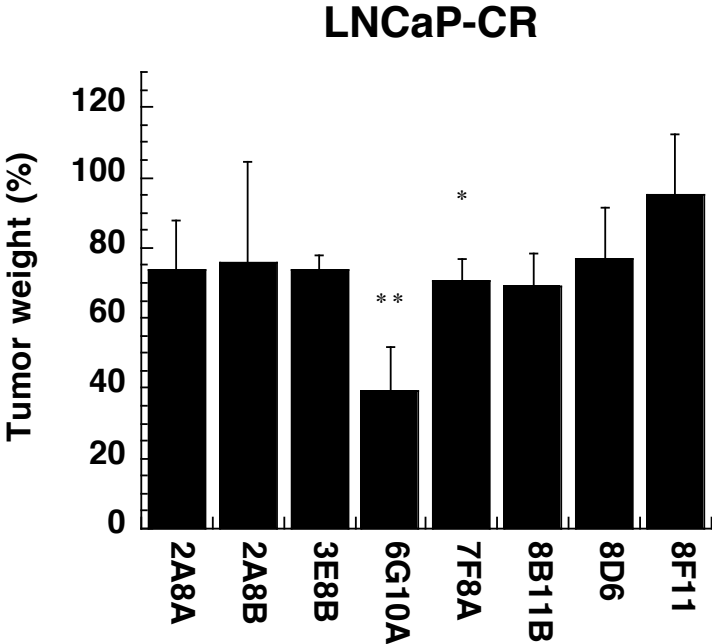

Supplementary Figure 2. Effect of anti-CXADR antibodies on the growth of LNCaP-CR tumors *in vivo*. LNCaP-CR cells were injected subcutaneously into male nude mice. One day after the cancer cell injection, the indicated antibodies were administered intravenously everyday for 11 days at 100  $\mu$ l/day. Mice were sacrificed 21 days after the cancer cell injection, and the LNCaP-CR tumors were excised and weighed. The values are means  $\pm$  SEM of percentage of control (n = 5). \*P<0.05 and \*\*P<0.01 versus the control values.

## Supplementary Figure 3

### LNCaP-CR

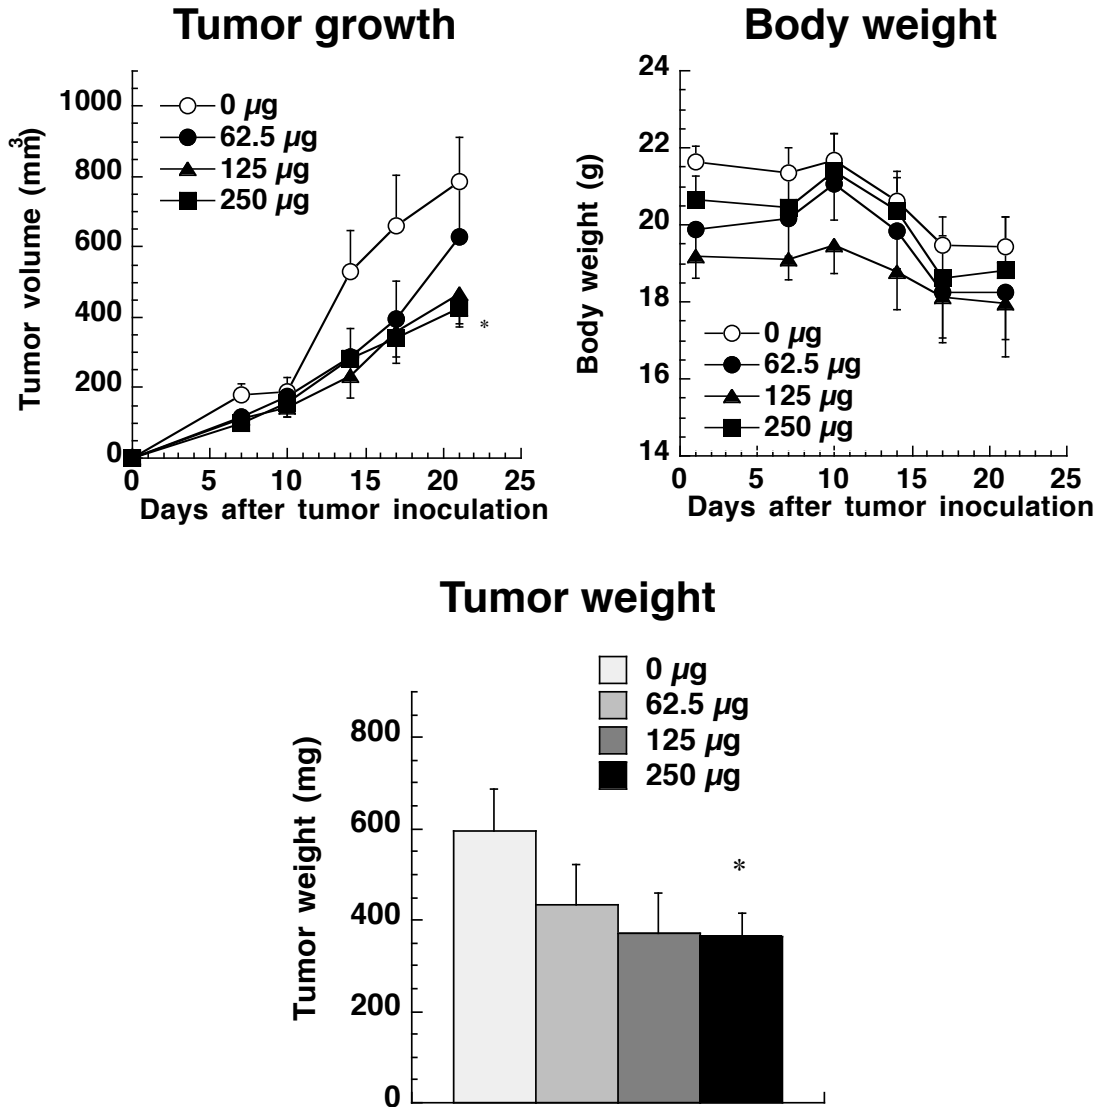

Supplementary Figure 3. Effect of anti-CXADR antibody 6G10A on the growth of LNCaP-CR subcutaneous tumors *in vivo*. LNCaP-CR cells were injected subcutaneously into male nude mice. The indicated doses of antibodies were administered intravenously 1, 7, and 14 days after the cancer cell injection. Mice were sacrificed 21 days after the cancer cell injection, and the LNCaP-CR tumors were excised and weighed. The values are means  $\pm$  SEM ( $n = 5$ ). \* $P < 0.05$  versus the control values.

Supplementary Figure 4

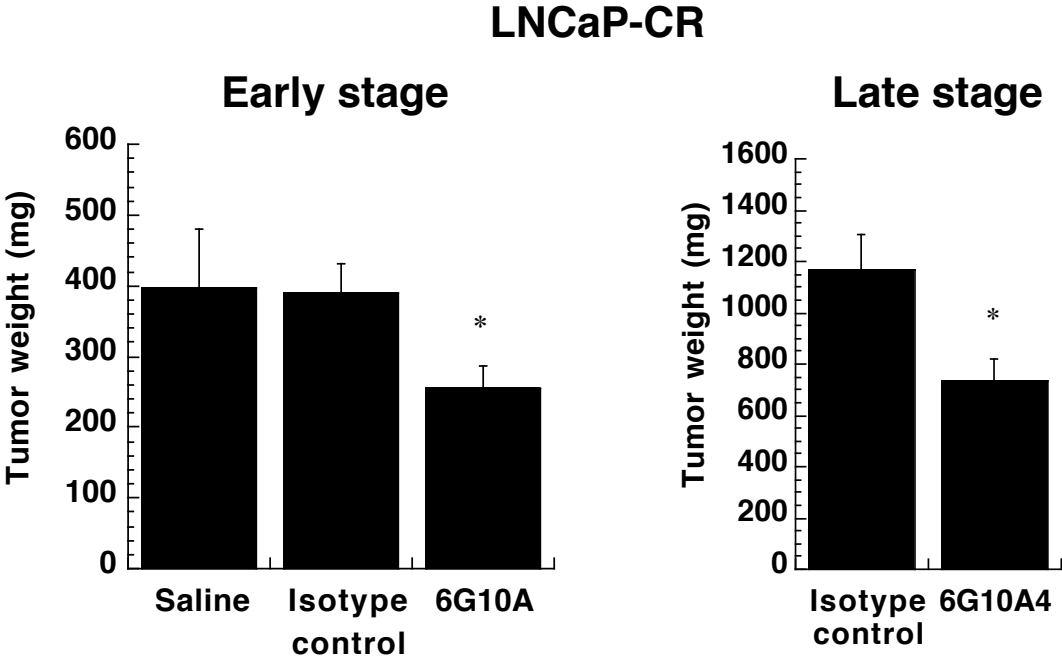

Supplementary Figure 4. Effect of anti-CXADR antibody 6G10A on the growth of late stage LNCaP-CR tumors *in vivo*. LNCaP-CR cells were injected subcutaneously into male nude mice. Antibodies (250 µg/day) were administered intravenously 1, 7, and 14 days (for early stage), or 14, 21, and 28 days (for late stage) after the cancer cell injection. Mice were sacrificed 21 (for early stage) or 35 (for late stage) days after the cancer cell injection, and the LNCaP-CR tumors were excised and weighed. The values are means  $\pm$  SEM (n = 5). \*P<0.05 versus the control values.

# Supplementary Figure 5

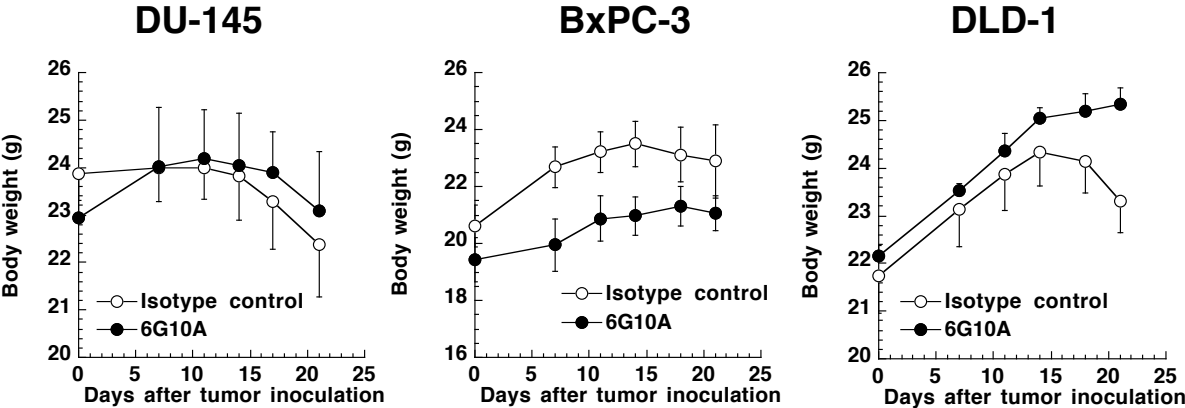

Supplementary Figure 5. Effect of anti-CXADR antibody 6G10A on mice body weight bearing various subcutaneous tumors *in vivo*. DU-145, BxPC-3, or DLD-1 cells were injected subcutaneously into male nude mice. Antibodies (250  $\mu\text{g}/\text{day}$ ) were administered intravenously 1, 7, and 14 days after the cancer cell injection. The values are means  $\pm$  SEM (n = 3). This result is corresponding to Fig. 4.

## Supplementary Figure 6

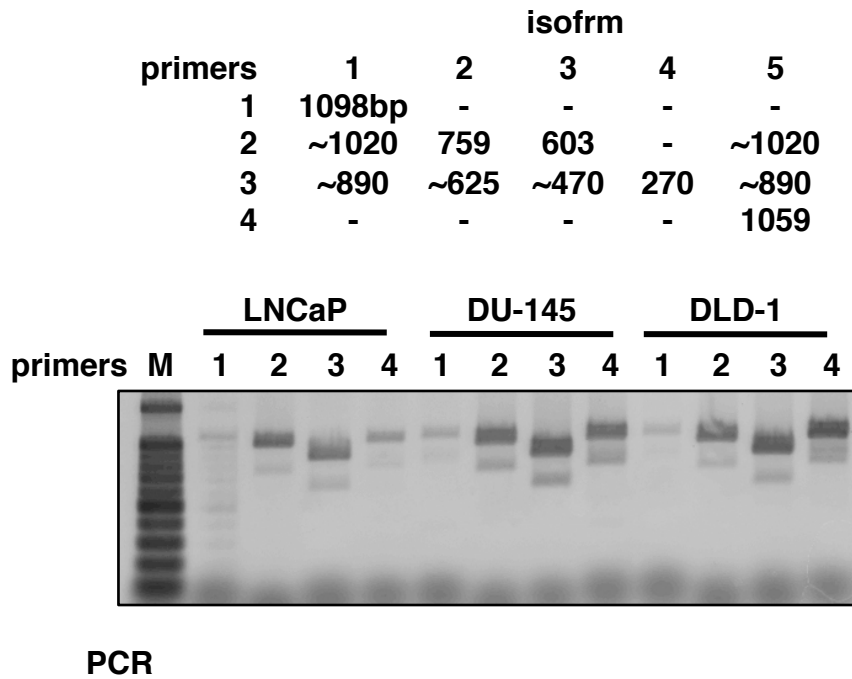

**Supplementary Figure 6. Expression of CXADR isoforms in various cancer cell lines.** PCR products for CXADR isoforms (1-5) were amplified using specific primer sets. Predicted sizes for each isoform are shown. M, 100bp DNA ladder maker.

**Supplementary Figure 7**

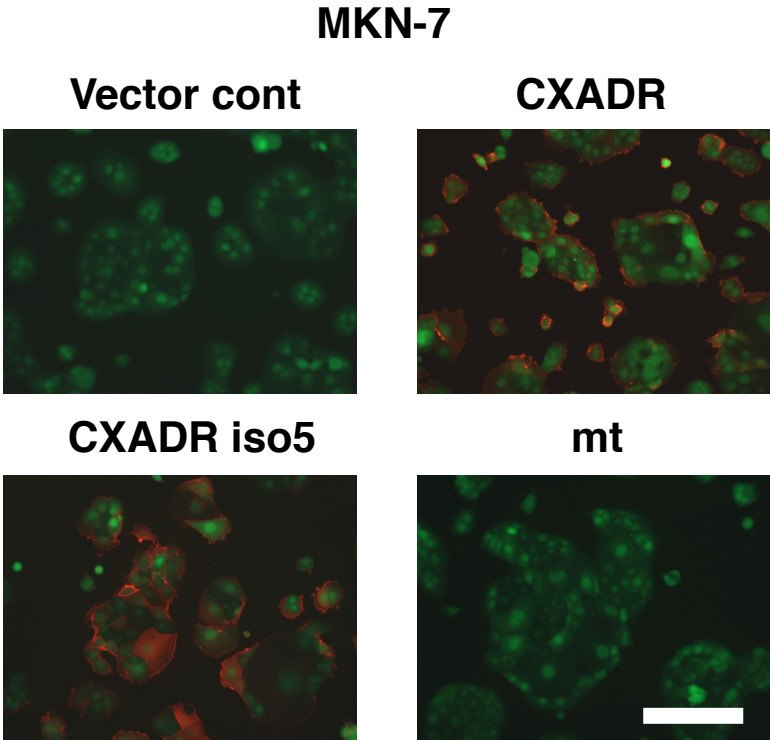

**Green, GFP**  
**Red, 6G10A (anti-CXADR)**

Supplementary Figure 7. Expression of CXADR isoforms in MKN-7 cells transfected with CXADR expression vectors. MKN-7 cells expressing a control vector (Vector cont), CXADR, or CXADR iso5 were fixed, stained with anti-CXADR antibody 6G10A, and analyzed by fluorescence microscopy. Scale bar is 200  $\mu$ m.



## Supplementary Figure 8

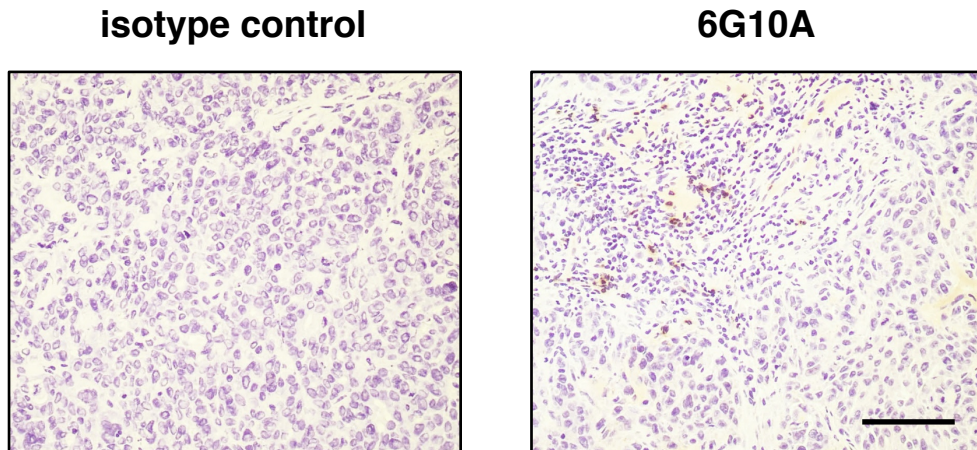

**Supplementary Figure 8. Immunohistochemical analysis of NK cells in xenograft tumors of DU-145 cells.** DU-145 cells were injected subcutaneously into male nude mice. Anti-CXADR antibody 6G10A clone (250  $\mu\text{g}/\text{day}$ ) was administered intravenously 1, 7, and 14 days after the cancer cell injection. Mice were sacrificed 21 days after the cancer cell injection and the DU-145 tumors were resected. Paraffin-embedded sections of the tumors were stained with anti-NCR1 antibody for the detection of NK cells. Scale bar is 100  $\mu\text{m}$ .

## Supplementary Figure 9

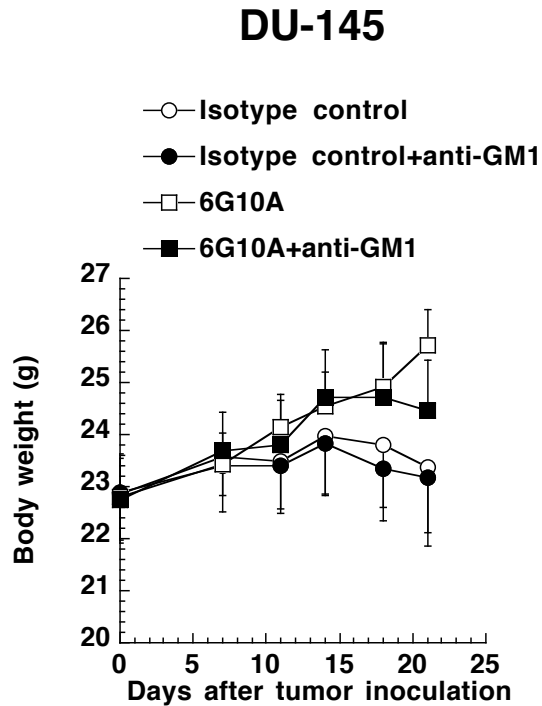

**Supplementary Figure 9. Effect of anti-CXADR antibody 6G10A on mice body weight treated with anti-asialo GM1 antibodies *in vivo*.** DU-145 cells were injected subcutaneously into male nude mice. NK cells were depleted with anti-asialo GM1 antibodies (100  $\mu\text{g}/\text{day}$ ) administered intravenously -1, 6, and 13 days after the cancer cell injection. Anti-CXADR antibody 6G10A clone (250  $\mu\text{g}/\text{day}$ ) was administered intravenously 1, 7, and 14 days after the cancer cell injection. The values are means  $\pm$  SEM (n = 5). This result is corresponding to Fig. 6b.

## Supplementary Figure 10

| Tissue   |        | Intensity |
|----------|--------|-----------|
| Breast   | Normal | +         |
|          | Tumor  | ++        |
| Brain    | Normal | -         |
|          | Tumor  | +++       |
| Lung     | Normal | -         |
|          | Tumor  | ++        |
| Skin     | Normal | ++        |
|          | Tumor  | +++       |
| Prostate | Normal | ++        |
|          | Tumor  | +         |
| Uterus   | Normal | -         |
|          | Tumor  | +++       |
| Ovary    | Normal | -         |
|          | Tumor  | ++        |
| Kidney   | Normal | +++       |
|          | Tumor  | +++       |

**Supplementary Figure 10. Immunoreactivity of anti-CXADR antibody 6G10A on human tissues.** Frozen sections from the indicated normal and tumor tissues (n=1) (BioChain) were stained with biotinylated anti-CXADR antibody 6G10A. The estimated visual intensity of 6G10A immunostaining was graded on arbitrary 4 point scales: negative (-), weakly positive (+), positive (++), and strong positive (+++).

# Supplementary Figure 11

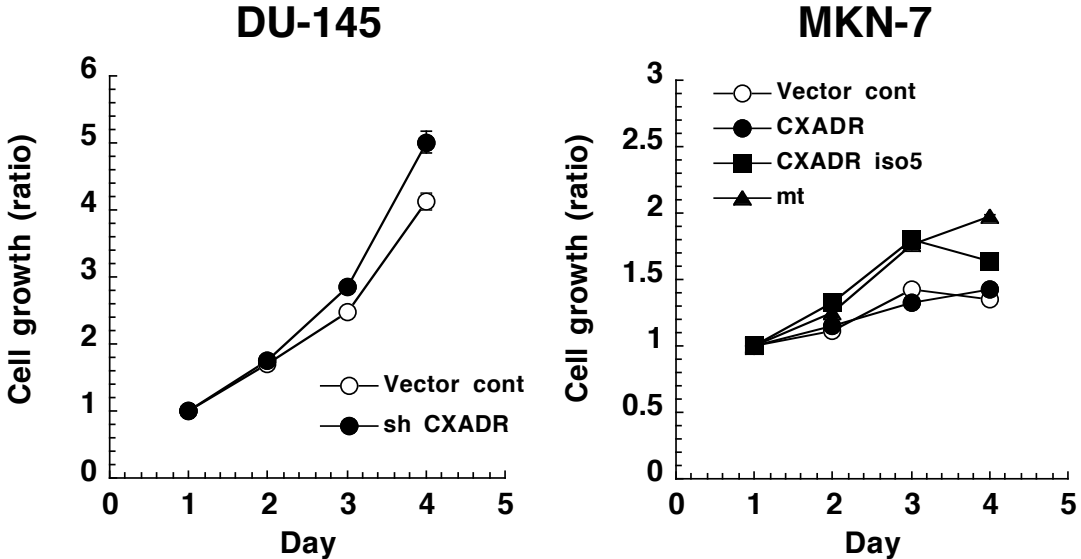

Supplementary Figure 11. Effect of knockdown or overexpression of CXADR on the growth of cancer cells *in vitro*. DU-145 cells expressing a control vector (Vector cont) or shRNA vector for CXADR (Sh CXADR) (left) or MKN-7 cells expressing a control vector (Vector cont), CXADR, CXADR iso5, or mutant CXADR (mt) (right) were cultured for the indicated days. Cell growth was determined using MTT. The values are means means  $\pm$  SEM (n = 4).

## Supplementary Figure 12

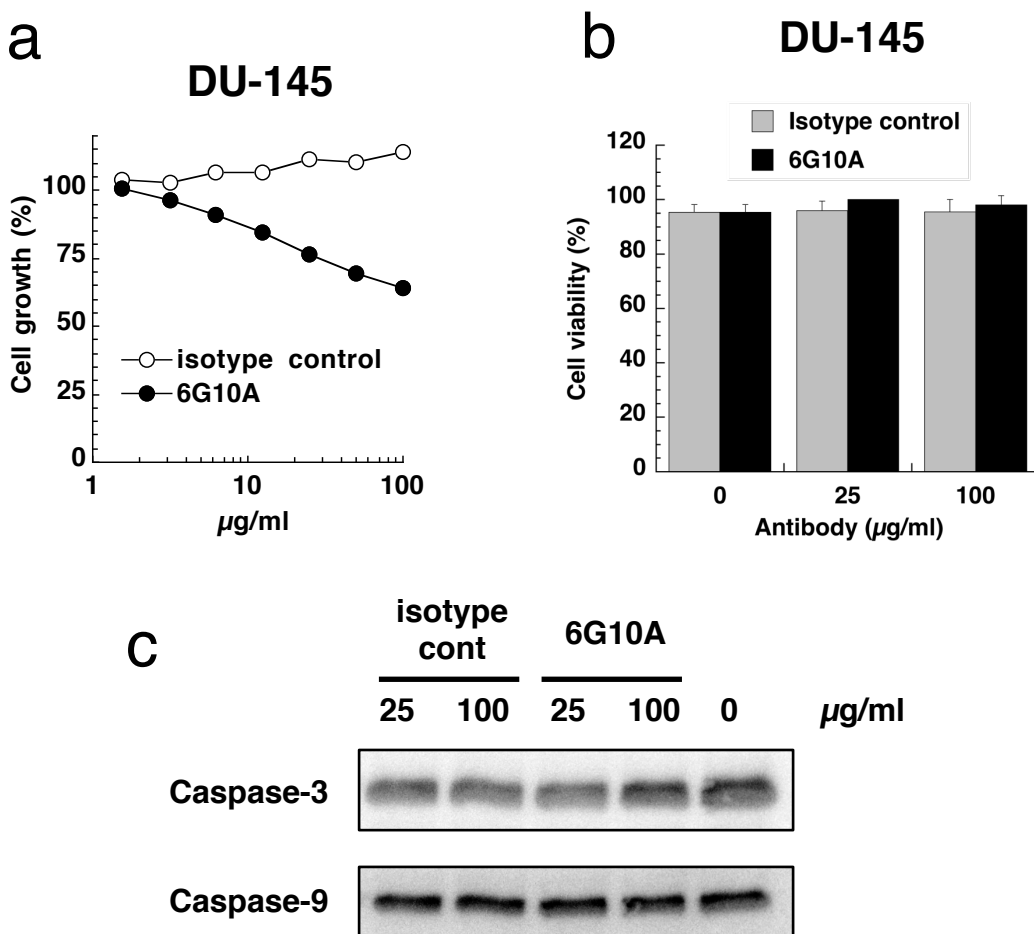

**Supplementary Figure 12. Effect of anti-CXADR antibody 6G10A on the growth of DU-145 cells *in vitro*.** (a) DU-145 cells were cultured with the indicated concentrations of antibodies for 3 days. Cell growth was determined using MTT. The values are means of duplicate experiments. Each SE is less than 10%. (b) DU-145 cells were cultured with the indicated concentrations of antibodies for 2 days. Cell viability was determined using trypan blue. The values are means  $\pm$  SEM ( $n = 3$ ). (c) DU-145 cells were cultured with the indicated concentrations of antibodies for 2 days. Expression of caspase-3 and caspase-9 was detected by Western blotting. The gels have been run under the same experimental conditions and cropped to show protein bands corresponding to caspase-3 or caspase-9 as indicated.

Supplementary Figure 13

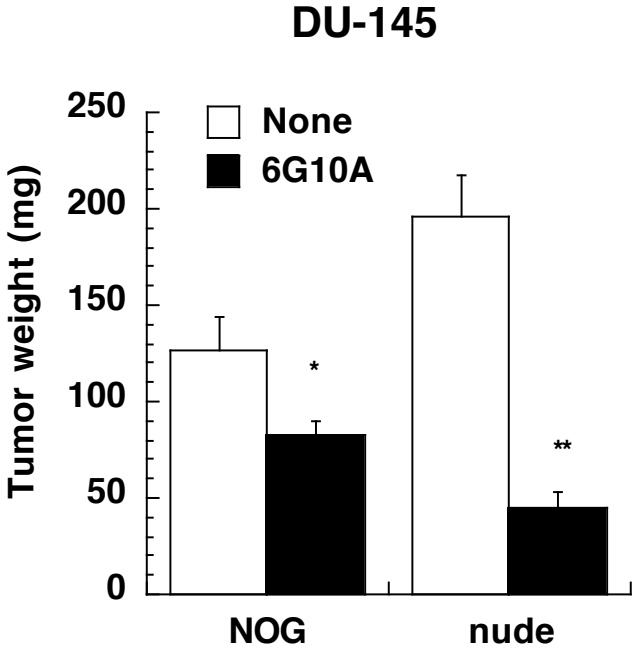

Supplementary Figure 13. Anti-tumor effect of anti-CXADR antibody 6G10A on NOG mice *in vivo*. DU-145 cells were injected subcutaneously into female NOG and female nude mice. Antibodies (250 µg/day) were administered intravenously 1, 7, and 14 days after the cancer cell injection. Mice were sacrificed 21 days after the cancer cell injection, and the tumors were excised and weighed. The values are means ± SEM (n = 5). \*P<0.05 and \*\*P<0.01 versus the control values.

**Supplementary Figure 14**

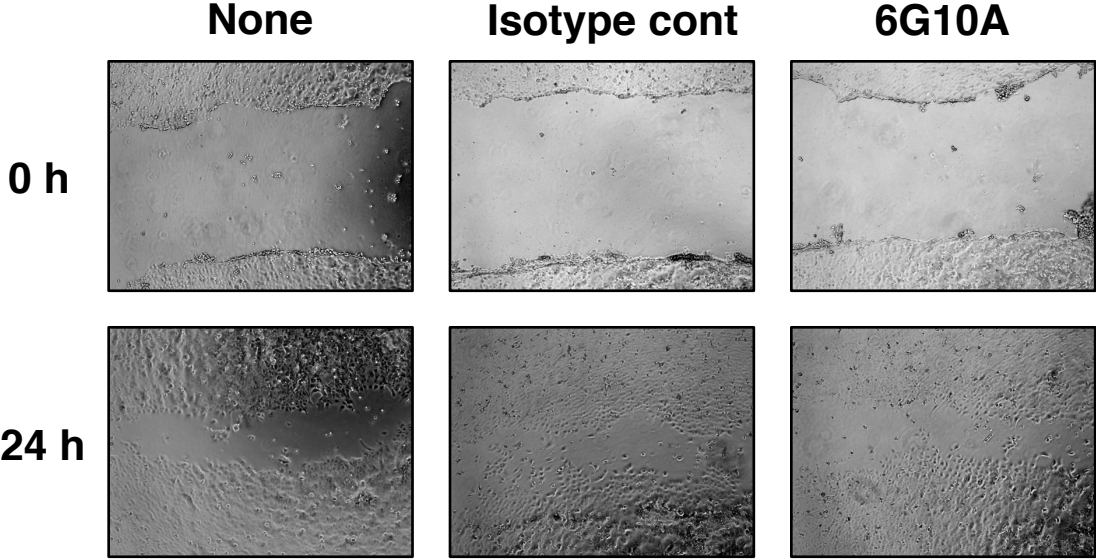

**Supplementary Figure 14. Effect of anti-CXADR antibody 6G10A on wound healing assay of DU-145 cells *in vitro*.** Confluent DU-145 cells were scratched by plastic pipette tips (0 h) and cultured with 100 µg/ml of the indicated antibodies for 24 h.

## Supplementary Figure 15

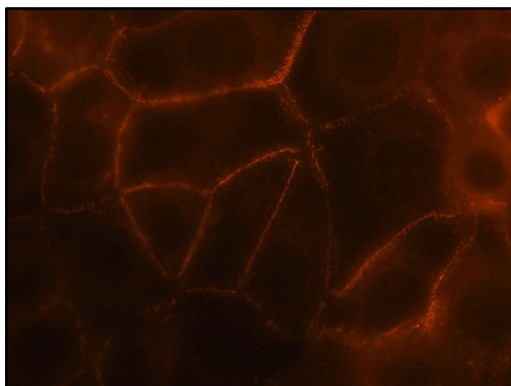

**Supplementary Figure 15. Localization of anti-CXADR antibody 6G10A in DU-145 cells *in vitro*.** DU-145 cells were treated with 5  $\mu\text{g}/\text{ml}$  of 6G10A overnight. The cells were fixed with methanol and stained with anti-mouse IgG Alexa Fluor 546.





**Supplementary Figure 17**

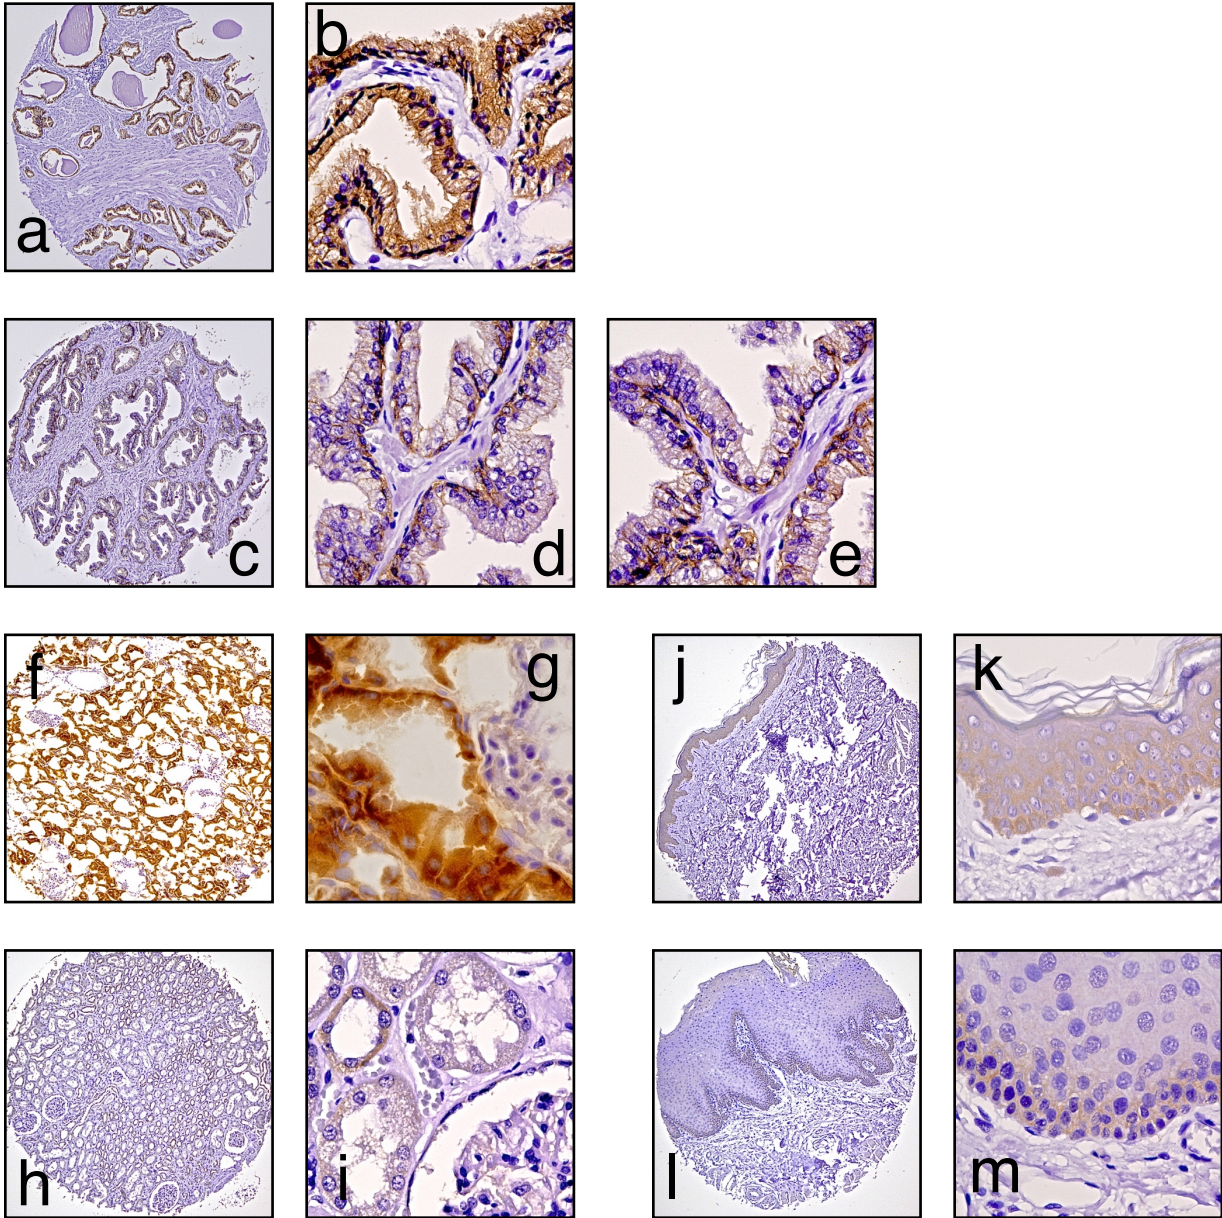

**Supplementary Figure 17. Immunoreactivity of anti-CXADR antibody 6G10A on human tissues.** Tissue sections (n=3) from prostate (a-e), kidney (f-i), and skin (j-m) were stained with anti-CXADR antibody 6G10A. Photos (b, d, e, g, i, k, m) are high magnification of photos (a, c, c, f, h, j, l), respectively.

## Supplementary Figure 18

| Antigen | CXADR antibody clone |      |      |       |      |       |     |      |
|---------|----------------------|------|------|-------|------|-------|-----|------|
|         | 2A8A                 | 2A8B | 3E8B | 6G10A | 7F8A | 8B11B | 8D6 | 8F11 |
| 1-83    | -                    | -    | -    | -     | -    | -     | -   | -    |
| 1-133   | -                    | -    | -    | -     | -    | -     | -   | -    |
| 1-181   | -                    | -    | -    | -     | +    | -     | -   | -    |
| 1-230   | +                    | +    | +++  | +++   | +++  | +++   | +++ | +    |
| 1-237   | +++                  | +++  | +++  | +++   | +++  | +++   | +++ | +++  |

**Supplementary Figure 18. Reactivity of anti-CXADR antibody clone against various CXADR mutants.** Ba/F3 cells expressing various antigens of CXADR were constructed. Then, reactivity of anti-CXADR antibody clone against them was determined by FACS analysis.
